# Supplementary material for: Aggregation-induced emission organic metal halide complex for X-ray scintillation
Source: Royal Society of Chemistry journal article supplement (doi:10.1039/d4mh00142g), 2024-01-01
Supplement: d4mh00142g1.pdf [file d4mh00142g1.pdf]

## Electronic Supporting Information

# Aggregation-Induced Emission (AIE) Organic Metal Halide Complex for X-ray Scintillation

Tunde Blessed Shonde,<sup>a</sup> He Liu,<sup>a</sup> Oluwadara Joshua Olasupo,<sup>a</sup> Alexander Bouchard,<sup>a</sup> Sara Bouchard,<sup>a</sup> Annaliese Franklin,<sup>a</sup> Xinsong Lin,<sup>a</sup> Luis M. Stand,<sup>c,d</sup> Biwu Ma<sup>\*,a,b</sup>

<sup>a</sup> Department of Chemistry and Biochemistry, Florida State University, Tallahassee, FL, 32306, USA.

<sup>b</sup> Materials Science and Engineering Program, Florida State University, Tallahassee, FL 32306, USA

<sup>c</sup> Department of Nuclear Engineering, University of Tennessee, Knoxville, TN 37996, USA.

<sup>d</sup> Scintillation Materials Research Center, University of Tennessee, Knoxville, TN 37996, USA.

\*Email: [bma@fsu.edu](mailto:bma@fsu.edu)

## Experimental Section

Materials: Zinc Chloride (99.999%), 4-bromotriphenylamine (97%), pyridine-4-boronic acid (90%), tetrakis(triphenylphosphine)-palladium(0),(99%), potassium carbonate (≥99.0%), tetrahydrofuran (THF, ≥99.9%), methanol (MeOH, ≥99.9%), dichloromethane (DCM, ≥99.8%), poly methylmethacrylate (average molecular weight- 120, 000) were all purchased from Sigma Aldrich. N, N-Dimethylformamide (DMF ≥99.8%), and diethyl ether (Et<sub>2</sub>O, ≥99.9%) were purchased from VWR. These materials were used without further purification after purchase. The elemental analysis was performed by Atlantic Microlab, Inc., Norcross, Georgia, USA.

Synthesis of N, N-diphenyl-4-(pyridin-4-yl) aniline (TPA-PD): 4-Bromotriphenylamine (7.4 mmol, 324.21 g/mol, 2.4 g), pyridine-4-boronic acid (12 mmol, 122.92 g/mol, 1.475 g), tetrakis(triphenylphosphine)-palladium(0) (0.297 mmol, 1155 g/mol, 0.344 g) and potassium carbonate (14.4 mmol, 138.21 g/mol, 2 g) were weighed into clean flask. This was followed by three cycles of repeated purging with N<sub>2</sub> and vacuum evacuation. A 120 ml of combined solvent (THF: MeOH; 1:1) of THF and MeOH was added with two cycles of purging with N<sub>2</sub> and vacuum evacuation. The mixture was refluxed at 90 °C for 36 hours under an N<sub>2</sub> atmosphere and then concentrated by rotary evaporation. TPA-PD was purified by column chromatography on silica gel with a mixture of petroleum ether and ethyl acetate as the eluent (7:1 by volume) to obtain about 55% TPA-PD white solid yield after recrystallization with DCM. <sup>1</sup>H NMR (600 MHz, DMF-D7) δ 8.65 - 8.61 (m, 2H), 7.82 (d, J = 8.7 Hz, 2H), 7.75 - 7.71 (m, 2H), 7.44 - 7.37 (m, 4H), 7.19 - 7.13 (m, 6H), 7.11 (d, J = 8.7 Hz, 2H).; HRMS (ESI) m/z: calc. value: 322.15; found 323.1567. Elemental analysis for TPA-PD (C<sub>23</sub>H<sub>18</sub>N<sub>2</sub>) calculated: C, 85.68; H, 5.63; N, 8.69. Found C, 84.86; H, 5.58; N, 8.69.

Synthesis of N,N-diphenyl-4-(pyridine-4-yl)aniline zinc (II) chloride (TPA-PD)<sub>2</sub>ZnCl<sub>2</sub>: 2:1 molar ratio of N,N-diphenyl-4-(pyridine-4-yl)aniline and zinc chloride were fully dissolved in the appropriate amount of DMF to form a precursor solution. This was followed by the addition of acetonitrile, 3× the volume of the precursor solution. Crystal formation of (TPA-PD)<sub>2</sub>ZnCl<sub>2</sub> within a few hours to a day is observed. This is followed by

washing with Et<sub>2</sub>O, achieving about 87% yield of (TPA-P)<sub>2</sub>ZnCl<sub>2</sub>. <sup>1</sup>H NMR (600 MHz, DMF-D7) δ 8.69 – 8.65 (m, 2H), 7.90 – 7.84 (m, 4H), 7.41 (dd, J = 8.4, 7.5 Hz, 4H), 7.17 (ddd, J = 3.7, 3.0, 1.3 Hz, 6H), 7.11 (d, J = 8.8 Hz, 2H). Elemental analysis for (TPA-PD)<sub>2</sub>ZnCl<sub>2</sub> (C<sub>46</sub>H<sub>36</sub>N<sub>4</sub>ZnCl<sub>2</sub>); Calculated: C, 70.73; H, 4.65; N, 7.17; Cl, 9.08. Found: C, 70.50; H, 4.65; N, 7.42; Cl, 9.09.

Fabrication of X-ray imaging scintillator film: 120 mg of (TPA-PD)<sub>2</sub>ZnCl<sub>2</sub> crystals were initially partially dissolved in 0.5 ml of chloroform. To ensure thorough mixing, the solution was vortex-mixed and sonicated for 2 hours. Following the dissolution of the crystals, 80 mg of poly(methyl methacrylate) (PMMA) was added to the solution. This mixture was then subjected to an additional 2 hours of sonication. Once this step was complete, the resulting solution was further stirred using a magnetic stirrer for 30 minutes. To prepare the substrate for film deposition, an ozone-cleaned glass surface was utilized. The well-mixed and homogenized slurry was carefully drop-cast onto the glass substrate and allowed to dry for 24 hours. It is noteworthy that during the drying process, a beaker housing was used to cover the substrate. This precaution was taken to ensure the film's uniformity and quality.

### Structural Characterization

Single-crystal X-ray data for (TPA-P)<sub>2</sub>ZnCl<sub>2</sub> was collected using a Rigaku XtaLAB Synergy-S diffractometer equipped with a HyPix-6000HE Hybrid Photon Counting (HPC) detector and dual Mo and Cu microfocus sealed X-ray source at 150 K. The powder X-ray diffraction (XRD) patterns were obtained using a Rigaku Smartlab powder diffractometer equipped with a Cu Kα X-ray source. Diffraction patterns were recorded from 5° to 50° 2θ with a step size of 0.05° under a tube current of 44 mA and tube voltage of 40 kV at room temperature. Further structural analysis of TPA-PD was done using <sup>1</sup>H B500 NMR equipped with a high-resolution 5 mm TXI (H-C/N-D) Zg probe. Mass spectrometry was performed using liquid chromatography- time-of-flight/mass spectrometry (LC-TOF/MS) (TOF 6230, LC 1260, Agilent) in a positive electrospray ionization (ESI) mode with a mass range of 100 – 1700 m/z.

### Optical Characterization

Excitation and steady-state photoluminescence were carried out using an Edinburgh FS5 steady state spectrometer with a 150 W xenon lamp. Time-Correlated Single Photon Counting (TCSPC) was performed for 10,000 counts using excitation from an Edinburgh EPL-360 picosecond pulsed diode laser. The PL decay was fitted using a biexponential decay function for TPA-PD and (TPA-PD)<sub>2</sub>ZnCl<sub>2</sub> and a mono-exponential decay function for BBPZn. The weighted average lifetime was computed according to equation (1).

$$\tau_{avg} = \frac{\sum \alpha_i \tau_i^2}{\sum \alpha_i \tau_i} \dots \dots \dots (1)$$

where τ<sub>i</sub> represents the decay time, and α<sub>i</sub> represents the amplitude of each component. PLQY measurement was performed using Hamamatsu Quantaurus-QY Spectrometer (Model C11347-11) equipped with a xenon lamp, an integrating sphere sample chamber, and a CCD detector. The PLQYs were calculated using the equation;

$$\eta QE = \frac{I_s}{ES_R - ES_s} \dots\dots\dots(2)$$

Where  $I_s$  stands for the photoluminescence emission spectrum of the sample, and  $ES_s$  and  $ES_R$  represent the excitation spectrum for the sample and reference, respectively.

**Thermal Stability Analysis**

DSC studies were done using a TA instrument Q600 system. The sample was heated from room temperature to 700 °C at a 5 °C/min rate under an argon flux of 100 mL/min.

**Radioluminescence Spectrum**

The RL spectra were acquired using an Edinburgh FS5 spectrofluorometer (Edinburgh Instruments) equipped with an X-ray source (Moxtek Mini-X tube with a W target and 4 W maximum power output, see Table S5 for voltage, current X-ray dose relationship). The X-ray response intensity was examined and collected by a Hamamatsu R928 PMT. The radiation dose rate of the X-ray source was calibrated by using RaySafe 452 dosimeter. The pulse height spectra of <sup>137</sup>Cs were collected using a standard bialkali Hamamatsu R2059 photomultiplier tube connected to a Canberra 2005 pre-amplifier, Ortec 672 spectroscopy amplifier, and a Tukan 8K multichannel analyzer. A shaping time of 10 μs was used to ensure complete light collection. The absolute light yield in photons per MeV was measured via the single photoelectron technique using a factory-measured quantum efficiency R2059 PMT.

To determine the Limit of detection (LOD), a series of the background signals were recorded without the sample under X-ray irradiation under 3.08 to 221.39 to 3.08 μGy s<sup>-1</sup> measurement. Then, a series of signal responses were taken with the sample under the above conditions, and the slope was determined. The LOD was calculated using the equation below, where  $Bk_{std}$  is the standard deviation of the background responses.

$$LOD = \frac{3 * Bk_{std}}{Slope} \dots\dots\dots(5)^1$$

**X-ray imaging**

The X-ray imaging system is a lab-built X-ray imaging system comprising of an X-ray, sample holder, light ray reflector, and a digital camera. The X-ray source used in the imaging was a Moxtek Mini-X tube with a W target and 4 W maximum power output. In this built imaging system, the X-ray beam passed vertically through the object of interest, and the scintillator film, right below it. The optical path of resulting radioluminescence was then deflected towards the camera by a reflector angled at the imaging system to remove the negative effect caused by direct X-ray irradiation of the camera. A digital camera was used to capture the deflected image and save it in jpeg format.

Table S1. Single crystal structure data of (TPA-PD)<sub>2</sub>ZnCl<sub>2</sub>

|                                                          | <b>(TPA-PD)<sub>2</sub>ZnCl<sub>2</sub></b>                                      |
|----------------------------------------------------------|----------------------------------------------------------------------------------|
| <b>Compound</b>                                          | (C <sub>23</sub> H <sub>18</sub> N <sub>2</sub> ) <sub>2</sub> ZnCl <sub>2</sub> |
| <b>CCDC number</b>                                       | 2181767                                                                          |
| <b>Empirical formula</b>                                 | C <sub>46</sub> H <sub>36</sub> N <sub>4</sub> ZnCl <sub>2</sub>                 |
| <b>Molecular weight/g/mole</b>                           | 781.06                                                                           |
| <b>Temperature/K</b>                                     | 150                                                                              |
| <b>Crystal system</b>                                    | Monoclinic                                                                       |
| <b>Space group</b>                                       | P2 <sub>1</sub> /c                                                               |
| <b>a/Å</b>                                               | 21.9901(3)                                                                       |
| <b>b/Å</b>                                               | 11.7699(2)                                                                       |
| <b>c/Å</b>                                               | 15.3428(2)                                                                       |
| <b>α/°</b>                                               | 90                                                                               |
| <b>β/°</b>                                               | 106.6460(2)                                                                      |
| <b>γ/°</b>                                               | 90                                                                               |
| <b>Volume/Å<sup>3</sup></b>                              | 3804.63(12)                                                                      |
| <b>Z</b>                                                 | 4                                                                                |
| <b>P<sub>calc</sub> g/cm<sup>3</sup></b>                 | 1.364                                                                            |
| <b>F (000)</b>                                           | 1616.0                                                                           |
| <b>H<sub>max</sub>, k<sub>max</sub>, l<sub>max</sub></b> | 27,14,19                                                                         |
| <b>T<sub>min</sub>, T<sub>max</sub></b>                  | 0.059,0.620                                                                      |
| <b>μ/mm<sup>-1</sup></b>                                 | 2.483                                                                            |
| <b>R<sub>1</sub>, wR<sub>2</sub></b>                     | 0.0487 <sup>a</sup> , 0.1378 <sup>b</sup>                                        |
| <b>Goodness-of-fit on F<sup>2</sup></b>                  | 1.085                                                                            |

a)  $R_1 = \sum ||F_o| - |F_c|| / \sum |F_o|$ . b)  $wR_2 = [\sum w(F_o^2 - F_c^2)^2 / \sum w(F_o^2)^2]^{1/2}$

Table S2. Selected bond distance and angles of (TPA-PD)<sub>2</sub>ZnCl<sub>2</sub>.

| Bonds                                             | Angle (°)    |
|---------------------------------------------------|--------------|
| Cl <sub>1</sub> -Zn <sub>1</sub> -Cl <sub>2</sub> | 122.19       |
| Cl <sub>1</sub> -Zn <sub>1</sub> -N <sub>1</sub>  | 107.23       |
| Cl <sub>1</sub> -Zn <sub>1</sub> -N <sub>3</sub>  | 105.50       |
| Cl <sub>2</sub> -Zn <sub>1</sub> -N <sub>1</sub>  | 107.99       |
| N <sub>1</sub> -Zn <sub>1</sub> -N <sub>3</sub>   | 104.33       |
| Zn1-N1-C <sub>24</sub>                            | 121.2        |
| Zn <sub>1</sub> -N <sub>1</sub> -C <sub>28</sub>  | 120.1        |
| Bonds                                             | Distance (Å) |
| Zn <sub>1</sub> -Cl <sub>1</sub>                  | 2.23         |
| Zn <sub>1</sub> -Cl <sub>2</sub>                  | 2.24         |
| Zn1-N1                                            | 2.05         |
| Zn <sub>1</sub> -N <sub>3</sub>                   | 2.04         |

Table S3. Fitting parameters for PL decay kinetics of BBPZn, TPA-PD, and (TPA-PD)<sub>2</sub>ZnCl<sub>2</sub>.

|  | A <sub>1</sub> | τ <sub>1</sub><br>(ns) | A <sub>2</sub> | τ <sub>2</sub><br>(ns) | τ <sub>avg</sub><br>(ns) |
|--|----------------|------------------------|----------------|------------------------|--------------------------|
|  |                |                        |                |                        |                          |

|                                             |        |        |        |        |      |
|---------------------------------------------|--------|--------|--------|--------|------|
| <b>BBPZn</b>                                | 1.0000 | 4.0036 |        |        | 4.00 |
| <b>TPA-PD</b>                               | 0.6816 | 0.9657 | 0.3184 | 2.9245 | 1.59 |
| <b>(TPA-PD)<sub>2</sub>ZnCl<sub>2</sub></b> | 0.8388 | 1.1588 | 0.1612 | 4.1841 | 1.81 |

Table S4. A figure of merit for reported scintillators based on metal-organic complexes.

| <b>S/N</b> | <b>Material</b>                         | <b>Light yield<br/>(Photon/MeV)</b> | <b>Decay lifetime<br/>(ns)</b> | <b>LOD<br/>(nGyS<sup>-1</sup>)</b> | <b>Ref</b>   |
|------------|-----------------------------------------|-------------------------------------|--------------------------------|------------------------------------|--------------|
| <b>1</b>   | CP1                                     | 21037                               | 8.47× 10 <sup>6</sup> (PL)     | 34.45                              | <sup>1</sup> |
| <b>2</b>   | CP2                                     | 10580                               | 4.36× 10 <sup>6</sup> (PL)     | 62.64                              | <sup>1</sup> |
| <b>3</b>   | CP3                                     | 13470                               | 2.31× 10 <sup>6</sup> (PL)     | 45.02                              | <sup>1</sup> |
| <b>4</b>   | (DXP) <sub>2</sub> MnBr                 | 18 400                              | 8.01× 10 <sup>6</sup> (PL)     | 65.1                               | <sup>2</sup> |
| <b>5</b>   | Tb-TPC                                  | 5453                                | 1.34× 10 <sup>5</sup> (PL)     | 1114                               | <sup>3</sup> |
| <b>6</b>   | Eu-TPC                                  | 6121                                | 4.63× 10 <sup>5</sup> (PL)     | 520                                | <sup>3</sup> |
| <b>7</b>   | CeCl <sub>3</sub> -Bu                   | 1920                                | NA                             | NA                                 | <sup>4</sup> |
| <b>8</b>   | CeBr <sub>3</sub> -Prop                 | 3218                                | NA                             | NA                                 | <sup>4</sup> |
| <b>9</b>   | Tb-1                                    | 4800                                | 7.64 × 10 <sup>5</sup> (PL)    | 243                                | <sup>5</sup> |
| <b>10</b>  | Passivated -Tb-1                        | 9000                                | NA                             | 146                                | <sup>5</sup> |
| <b>12</b>  | BBPZn                                   | 6249                                | 4.00 (PL)<br>6.78 (RL)         | 15.56                              | This<br>work |
| <b>13</b>  | (TPA-PD) <sub>2</sub> ZnCl <sub>2</sub> | 13 423                              | 1.81 (PL)<br>5.24 (RL)         | 80.23                              | This<br>work |

Table S5. Experimental dose rate.

| <b>S/N</b> | <b>Dose rate<br/>(μgray/sec)</b> | <b>Voltage<br/>(kV)</b> | <b>Current<br/>(μA)</b> |
|------------|----------------------------------|-------------------------|-------------------------|
| <b>1</b>   | 221.39                           | 40                      | 100                     |

|           |        |    |    |
|-----------|--------|----|----|
| <b>2</b>  | 210.56 | 40 | 95 |
| <b>3</b>  | 199.44 | 40 | 90 |
| <b>4</b>  | 188.06 | 40 | 85 |
| <b>5</b>  | 177.22 | 40 | 80 |
| <b>6</b>  | 166.11 | 40 | 75 |
| <b>7</b>  | 155.00 | 40 | 70 |
| <b>8</b>  | 143.89 | 40 | 65 |
| <b>9</b>  | 132.78 | 40 | 60 |
| <b>10</b> | 121.67 | 40 | 55 |
| <b>11</b> | 110.83 | 40 | 50 |
| <b>12</b> | 99.72  | 40 | 45 |
| <b>13</b> | 88.61  | 40 | 40 |
| <b>14</b> | 77.5   | 40 | 35 |
| <b>15</b> | 66.38  | 40 | 30 |
| <b>16</b> | 55.28  | 40 | 25 |
| <b>17</b> | 44.17  | 40 | 20 |
| <b>18</b> | 31.39  | 35 | 20 |
| <b>19</b> | 19.14  | 30 | 20 |
| <b>20</b> | 9.03   | 25 | 20 |
| <b>21</b> | 3.08   | 20 | 20 |

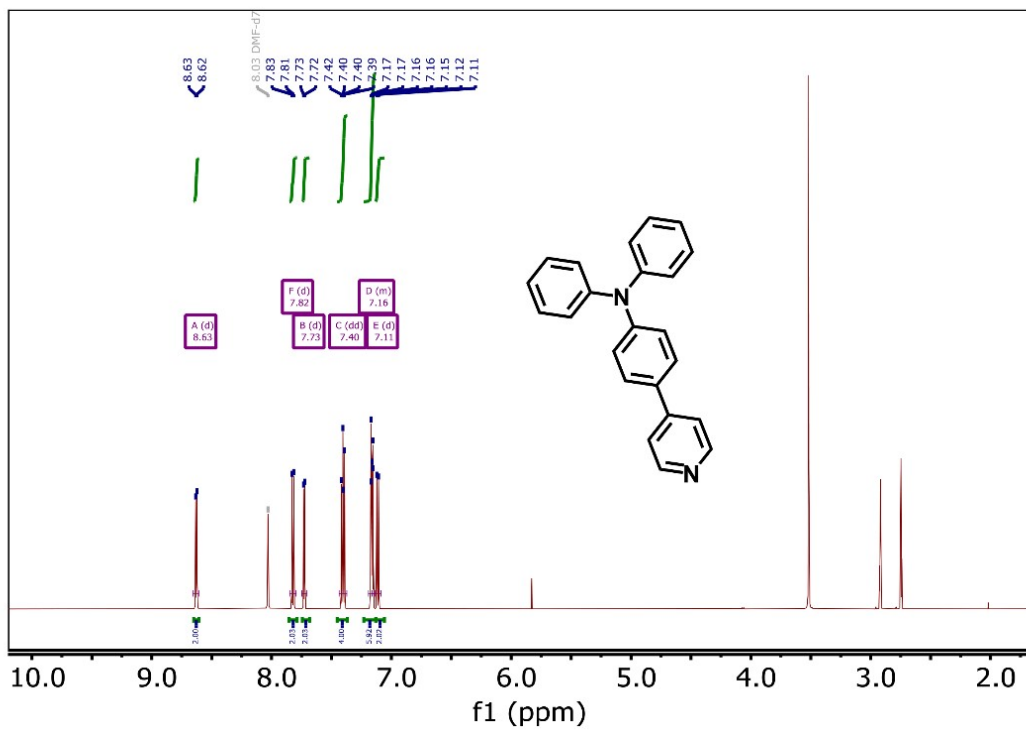

Figure S1. NMR characterization of TPA-PD.  $^1\text{H}$  NMR of TPA-PD.

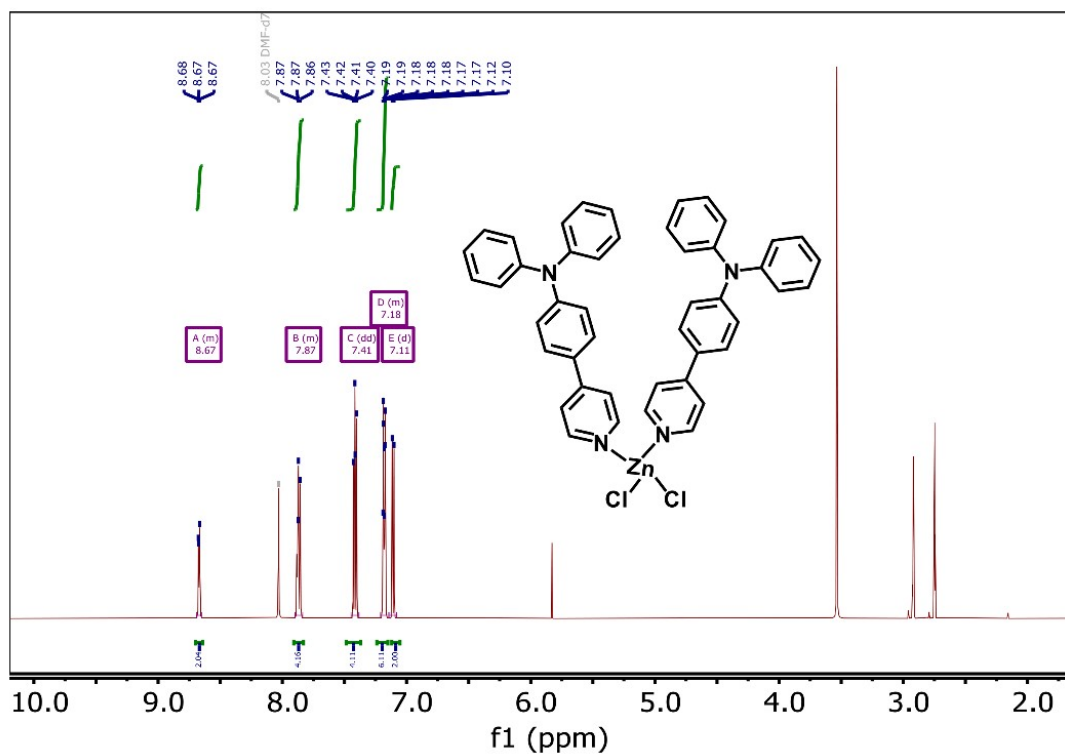

Figure S2. NMR characterization of  $(\text{TPA-PD})_2\text{ZnCl}_2$ .  $^1\text{H}$  NMR of  $(\text{TPA-PD})_2\text{ZnCl}_2$ .



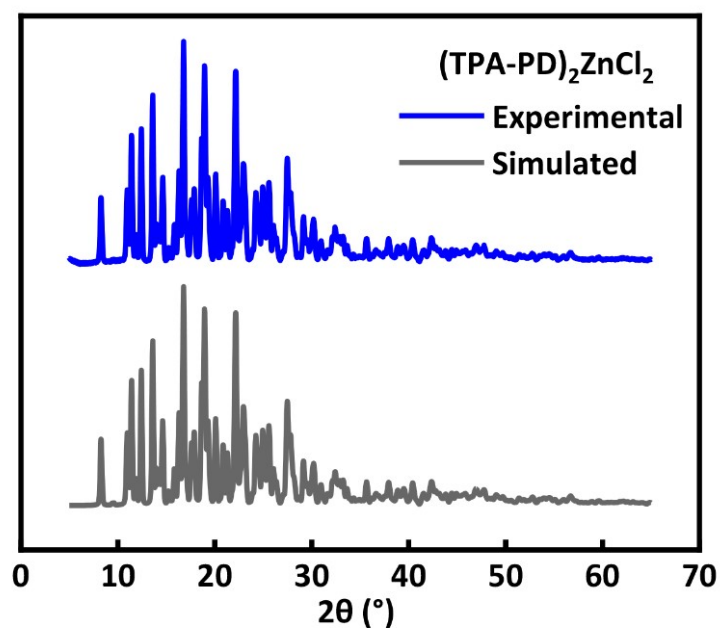

Figure S3. PXRD of  $(\text{TPA-PD})_2\text{ZnCl}_2$ . Comparison between the experimental and simulated PXRD Patterns of  $(\text{TPA-PD})_2\text{ZnCl}_2$ .

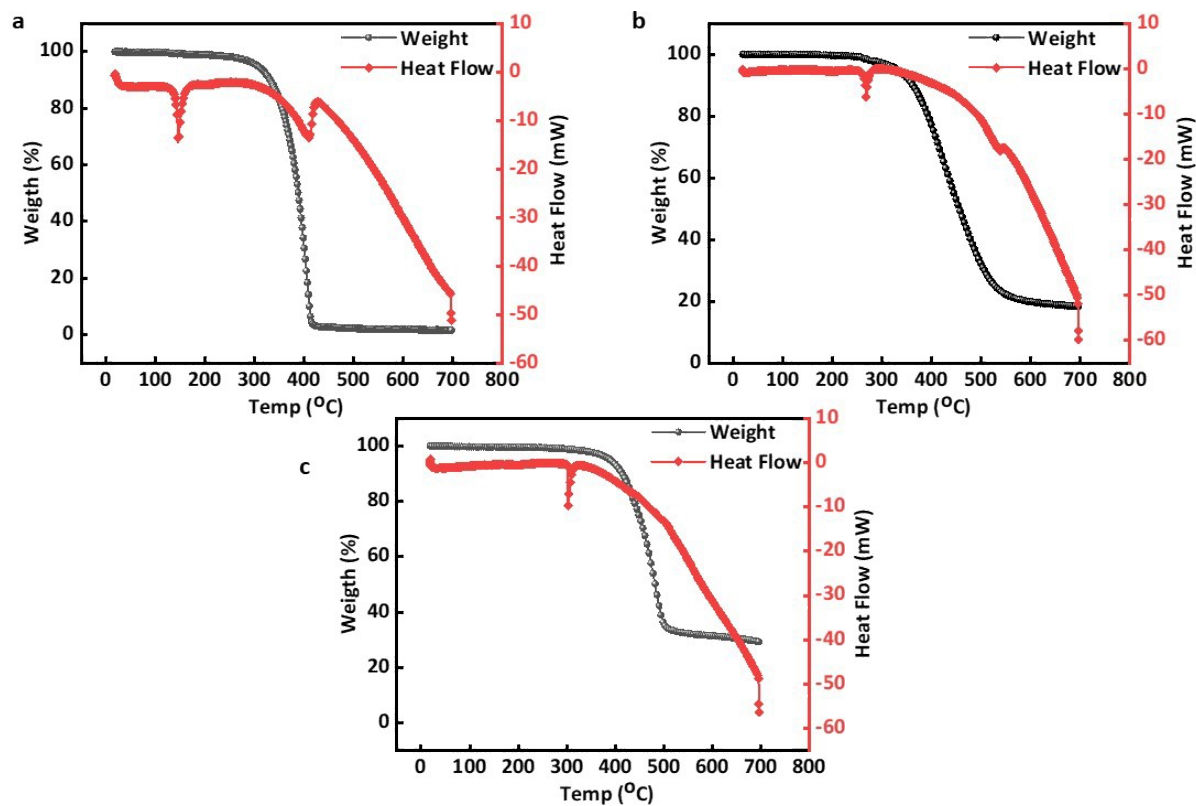

Figure S4. Thermal analysis. Thermogravimetric and differential scanning calorimetric analysis of a) TPA-PD; b)  $(\text{TPA-PD})_2\text{ZnCl}_2$ ; (c) BBPZn.

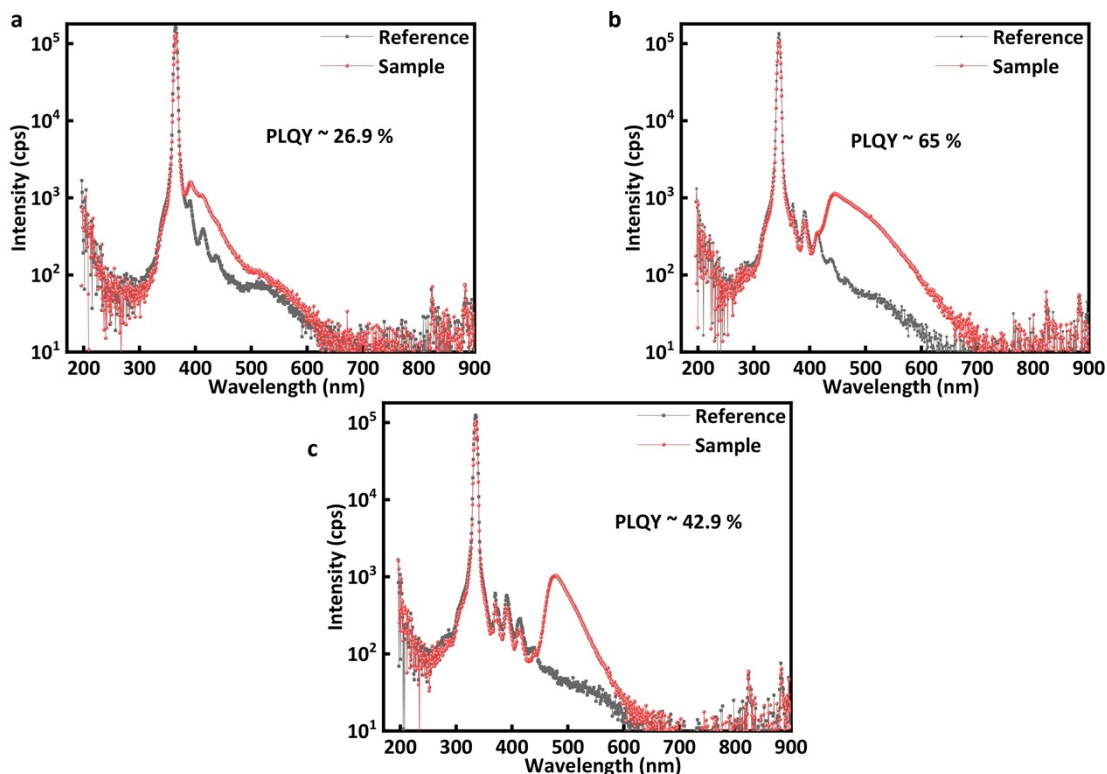

Figure S5. Photophysical Characterization. Photoluminescence Quantum Yields of; (a) TPA-PD; (b)  $(\text{TPA-PD})_2\text{ZnCl}_2$ ; and (c) BBPZn.

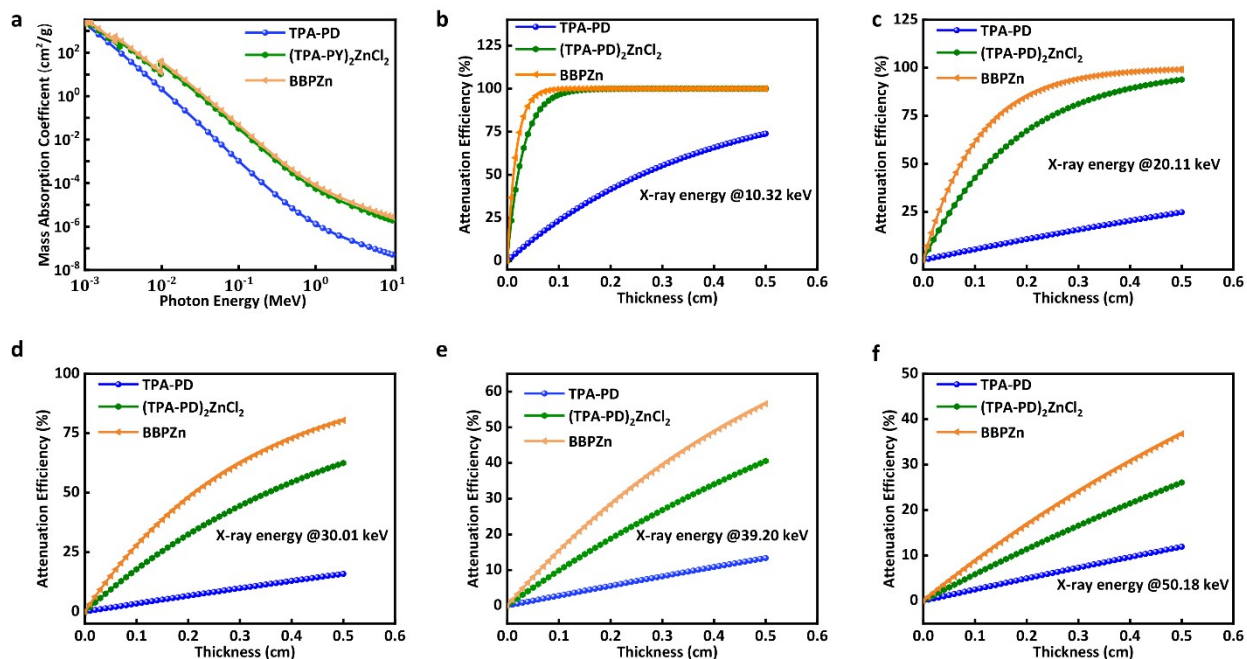

Figure S6. Computed high-energy radiation absorption. (a) Mass absorption coefficient vs photon energy plot of TPA-PD,  $(\text{TPA-PD})_2\text{ZnCl}_2$  and BBPZn; (b, c, d, e) X-ray Energy (10.32 KeV, 20.11 KeV, 30.01 keV, 39.20 keV and 50.18 keV respectively) efficiency vs thickness of TPA-PD,  $(\text{TPA-PD})_2\text{ZnCl}_2$ , and BBPZn.

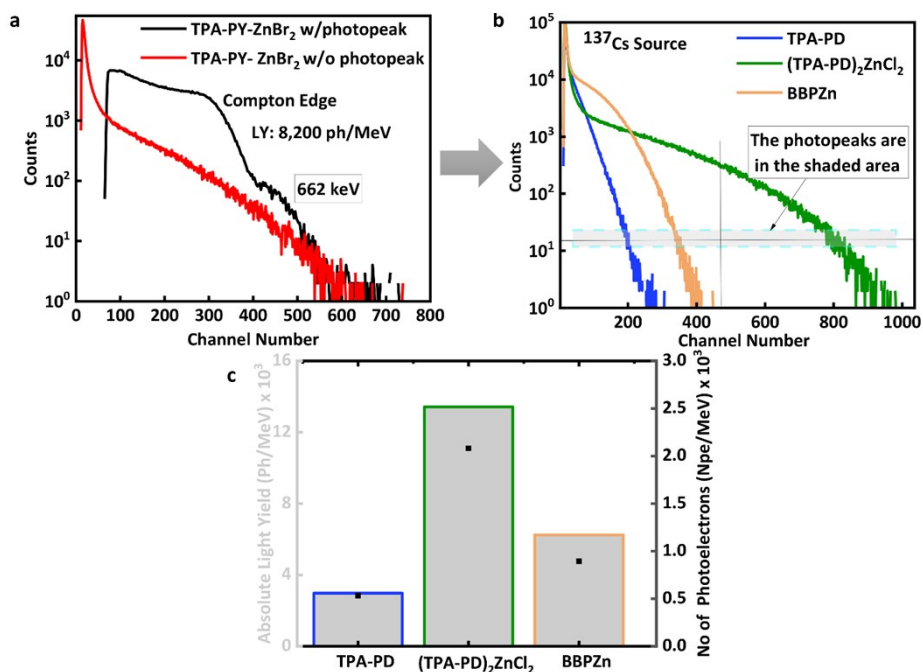

Figure S7. Absolute light yield measurement. (a) Counts vs Channel plot of (TPA-PD)<sub>2</sub>ZnBr<sub>2</sub> with <sup>137</sup>Cs excitation source (b) Counts vs Channel plot of TPA-PD, (TPA-PD)<sub>2</sub>ZnCl<sub>2</sub> and BBPZn with <sup>137</sup>Cs excitation source; (c) Absolute light and number of photoelectrons bar chart of TPA-PD, (TPA-PD)<sub>2</sub>ZnCl<sub>2</sub>, and BBPZn.

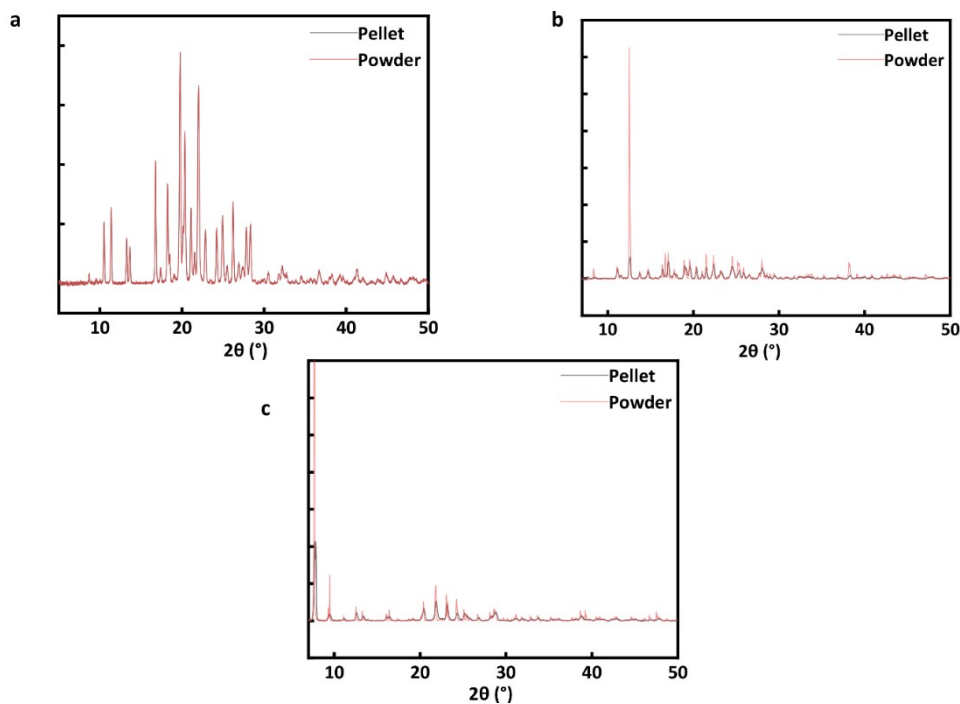

Figure S8. Powder X-ray Diffraction (PXRD). PXRD data comparison of pellet and powder of (a) TPA-PD; (b) (TPA-PD)<sub>2</sub>ZnCl<sub>2</sub>; (c) BBPZn.

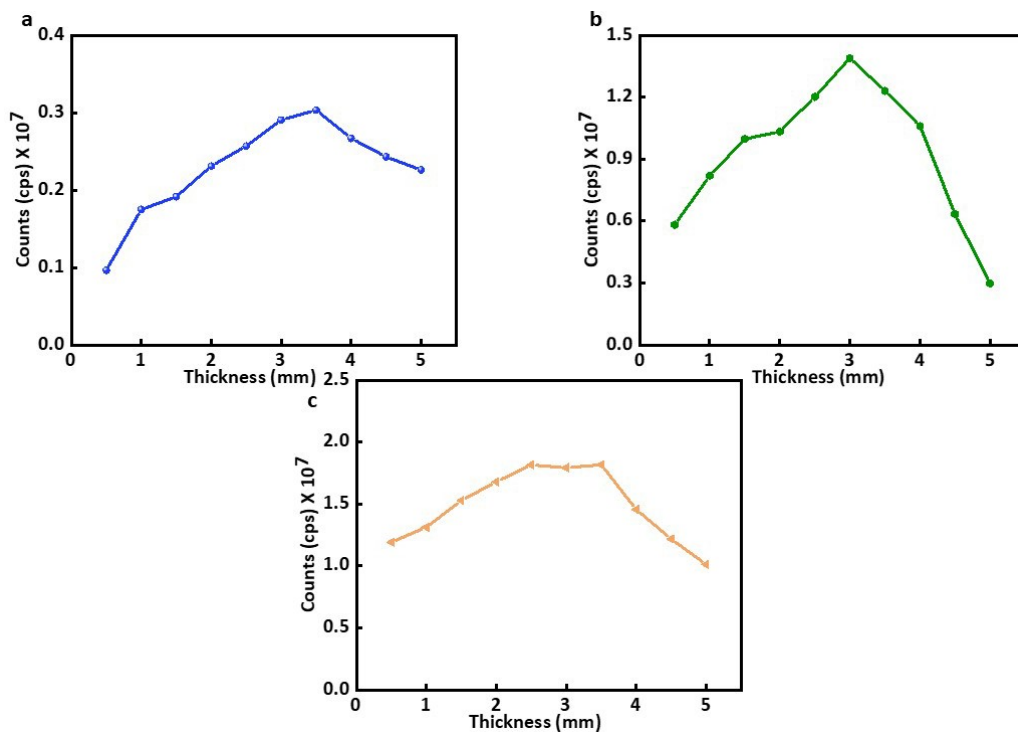

Figure S9. Thickness-dependent radioluminescence. Integrated radioluminescence of (a) TPA-PD; (b) (TPA-PD)<sub>2</sub>ZnCl<sub>2</sub>; (c) BBPZn at different thicknesses.

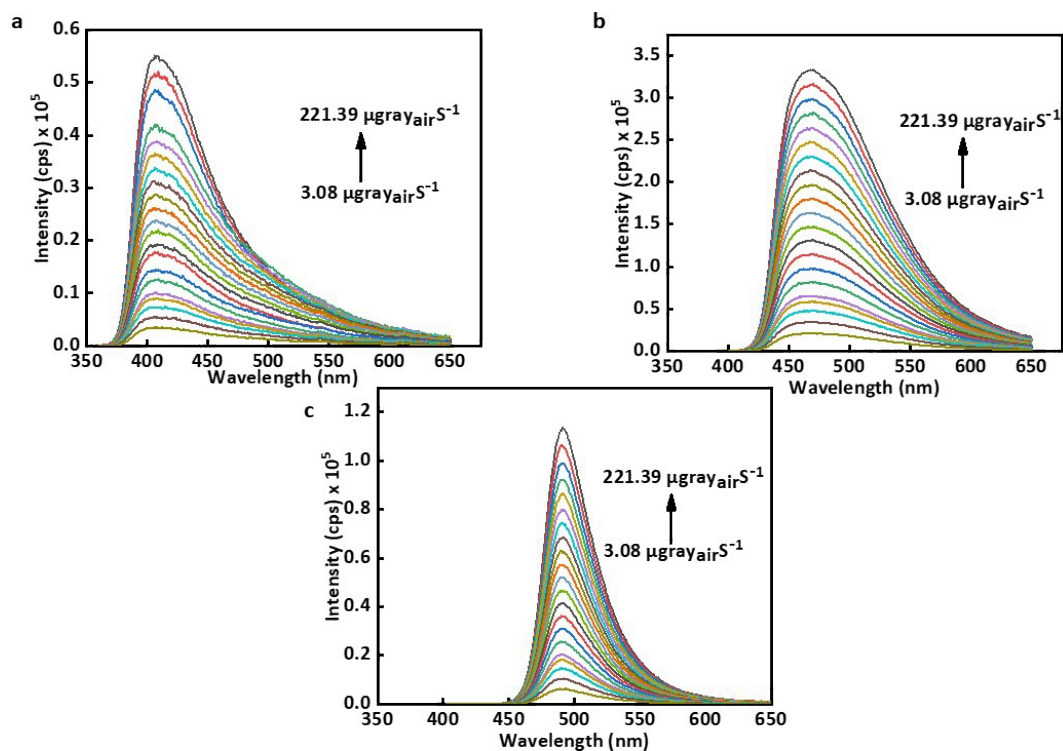

Figure S10. Dose-Response. Radioluminescence spectra of under X-ray excitation dose rate from 221.39 to 3.08 μGy<sub>air</sub> s<sup>-1</sup> of: (a) TPA-PD; (b) (TPA-PD)<sub>2</sub>ZnCl<sub>2</sub>; (c) BBPZn.

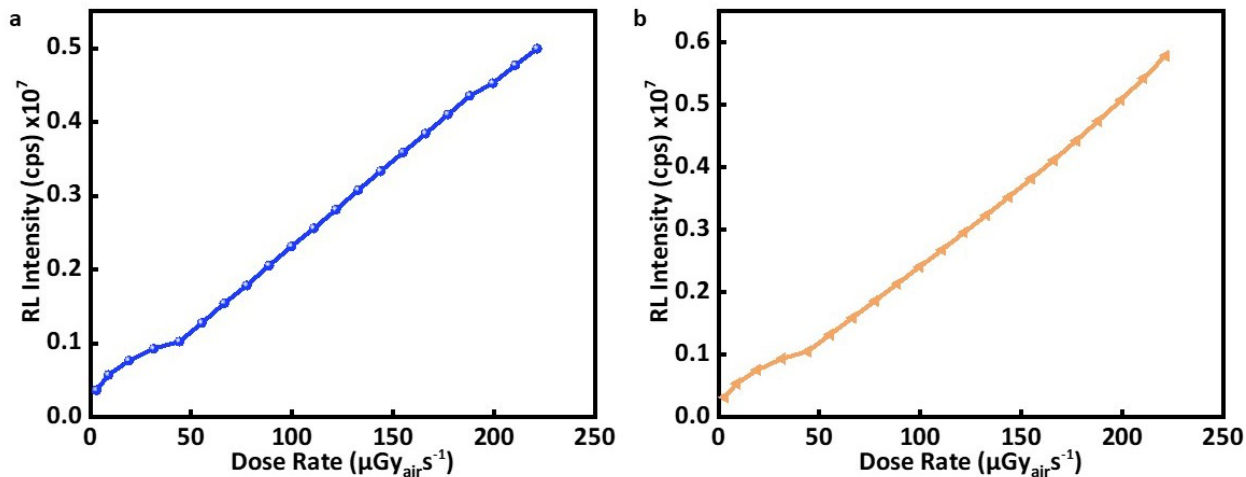

Figure S11. Dose-Response. Integrated radioluminescence spectra under X-ray excitation dose rate from 221.39 to 3.08  $\mu\text{Gy}_{\text{air}}\text{s}^{-1}$  of; (a)TPA-PD; (b) BBPZn.

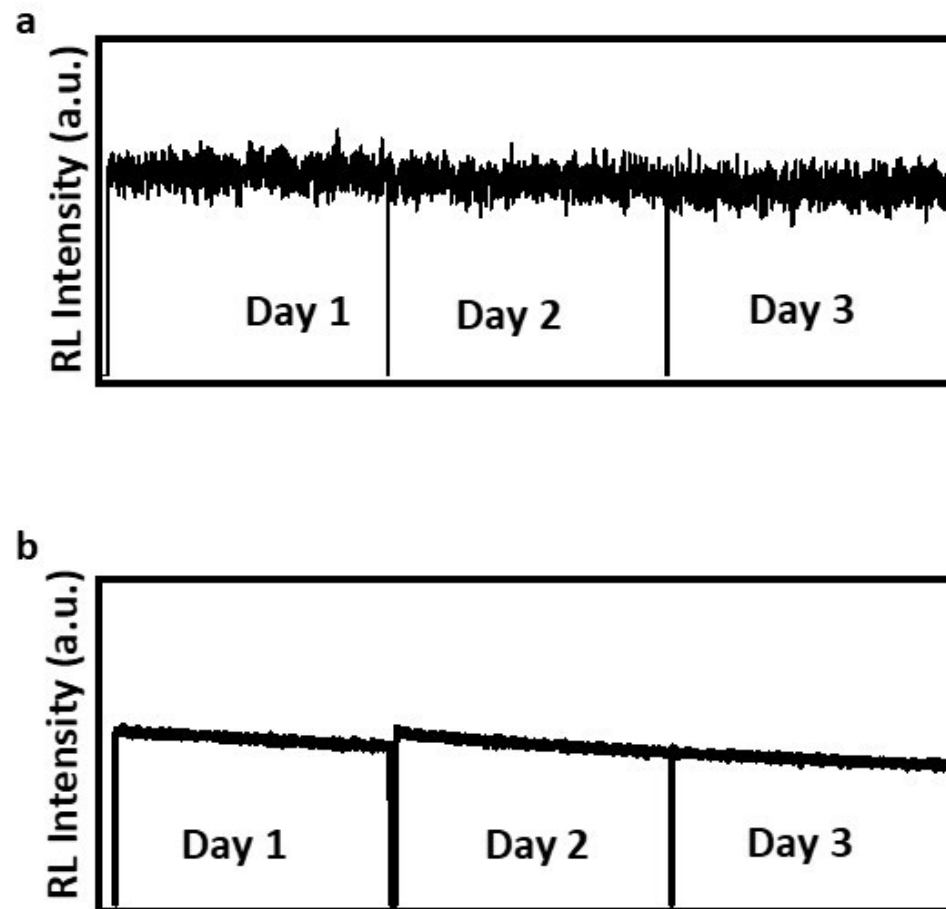

Figure S12. Radio-stability. Radiation stability under continuous irradiation ( $221.39 \mu\text{Gy}_{\text{air}}\text{s}^{-1}$ ) for 30 mins for Day 1, Day 2 and Day 3 of; (a) TPA-PD; (b) BBPZn.

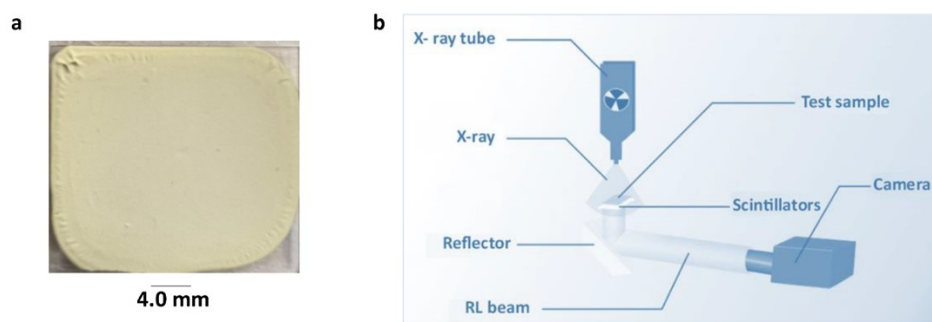

Figure S13. (a) 60 wt% (TPA-PD)<sub>2</sub>ZnCl<sub>2</sub> - PMMA composite; (b) Schematic of lab-built X-ray imaging setup.

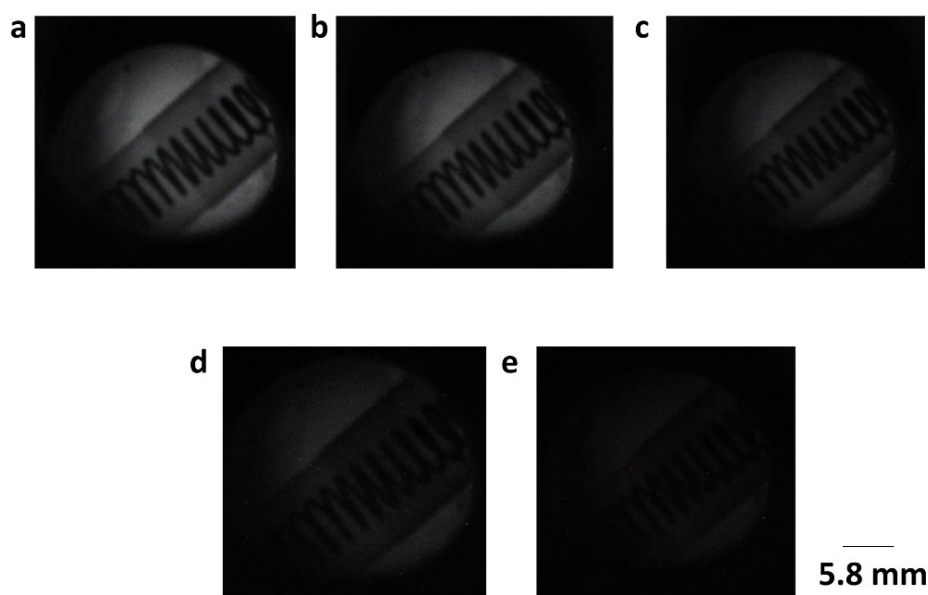

Figure S14. X-ray Images of encapsulated spring under various X-ray dose rates. X-ray images under; (a) 40 kV, 100 $\mu$ A; (b) 40 kV, 60  $\mu$ A; (c) 40 kV, 40  $\mu$ A; (d) 20 kV, 100 $\mu$ A; (e) 40 kV, 20  $\mu$ A X-ray irradiation

## References

1. Z. Zhou, H. Meng, F. Li, T. Jiang, Y. Yang, S. Liu and Q. Zhao, *Inorg Chem*, 2023, **62**, 5729-5736.
2. H. Meng, W. Zhu, F. Li, X. Huang, Y. Qin, S. Liu, Y. Yang, W. Huang and Q. Zhao, *Laser & Photonics Reviews*, 2021, **15**, 2100309.
3. X. Liu, S. Wang, W. Xie, J. Ni, K. Xiao, S. Liu, W. Lv and Q. Zhao, *Journal of Materials Chemistry C*, 2023, **11**, 7405-7410.
4. L. A. Boatner, J. S. Neal, J. O. Ramey, B. C. Chakoumakos, R. Custelcean, E. V. D. Van Loef, G. Markosyan and K. S. Shah, *Nuclear Instruments and Methods in Physics Research Section A: Accelerators, Spectrometers, Detectors and Associated Equipment*, 2013, **703**, 138-144.
5. Z. Chen, D. Lu, H. Xie, X. Yang, Y. Li, C. Bao, L. Lei and S. Xu, *Advanced Optical Materials*, 2021, **10**, 2102074.
